# Supplementary material
Source: MDPI journal article supplement (https://www.mdpi.com/2071-1050/13/21/12067)
Supplement: s1 [file s1 › sustainability-1415597-SI.pdf]

# Combined Impacts of Climate and Land use Changes on Long-Term Streamflow in the Upper Halda Basin, Bangladesh

Farzana Raihan <sup>1,2, \*</sup>, Gabrijel Ondrasek <sup>3</sup>, Mohammad Shahidul Islam <sup>4</sup>, Joseph M. Maina <sup>5</sup> and Linda J. Beaumont <sup>2</sup>

2

<sup>1</sup> Department of Forestry and Environmental Sciences, Shahjalal University of Science and Technology, Sylhet 3114, Bangladesh

<sup>2</sup> Department of Biological Sciences, Macquarie University, North Ryde, NSW 2109, Australia; linda.beaumont@mq.edu.au

<sup>3</sup> Faculty of Agriculture, University of Zagreb, 10000 Zagreb, Croatia; gondrasek@agr.hr

<sup>4</sup> Department of Statistics, Shahjalal University of Science and Technology, Sylhet 3114, Bangladesh; shahed.stat@gmail.com

<sup>5</sup> Department of Earth and Environmental Sciences, Macquarie University, North Ryde, NSW 2109, Australia; joseph.mbui@mq.edu.au

\* Correspondence: fraihan-for@sust.edu

**Table S1.** List of Regional Climate Models (RCMs) and of their associated Global Climate Models (GCMs) used in this study.

| Institute                                                               | Name                                                    | GCM            | RCM        | Reference                         |
|-------------------------------------------------------------------------|---------------------------------------------------------|----------------|------------|-----------------------------------|
| Commonwealth Scientific and Industrial Research Organisation, Australia | Australian Community Climate and Earth System simulator | ACCESS1.0      | CCAM-1391M | (Bi <i>et al.</i> , 2013)         |
| National Centre for Atmospheric Research                                | The Community Climate System Model                      | CCSM4.0        | CCAM-1391M | (Gent <i>et al.</i> , 2011)       |
| National Centre for Meteorological Research                             | Coupled Global Climate Model Version-5                  | CNRM-CM5       | CCAM-1391M | (Voldoire <i>et al.</i> , 2013)   |
| Max Planck Institute for Meteorology                                    | Max Planck Institute for Meteorology-Earth System Model | MPI-ESM-LR     | CCAM-1391M | (Giorgetta <i>et al.</i> , 2013)  |
| Irish Centre for High-End Computing, EC-Earth Consortium                | Irish Centre for High End Computing                     | ICHEC-EC-EARTH | RCA4       | (Samuelsson <i>et al.</i> , 2011) |

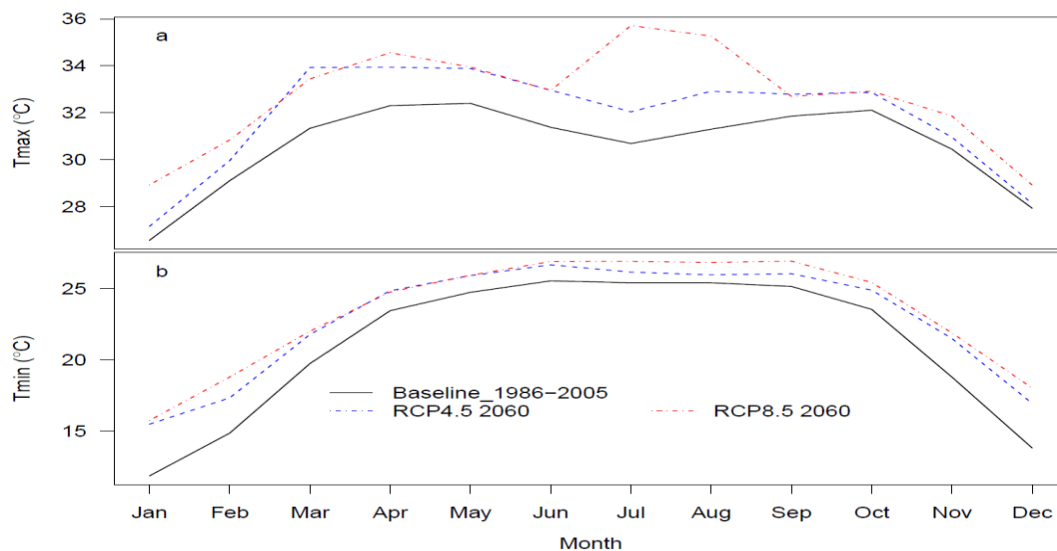

**Figure S1.** Mean monthly multi-model future temperature projection for RCP4.5 and 8.5 scenarios.

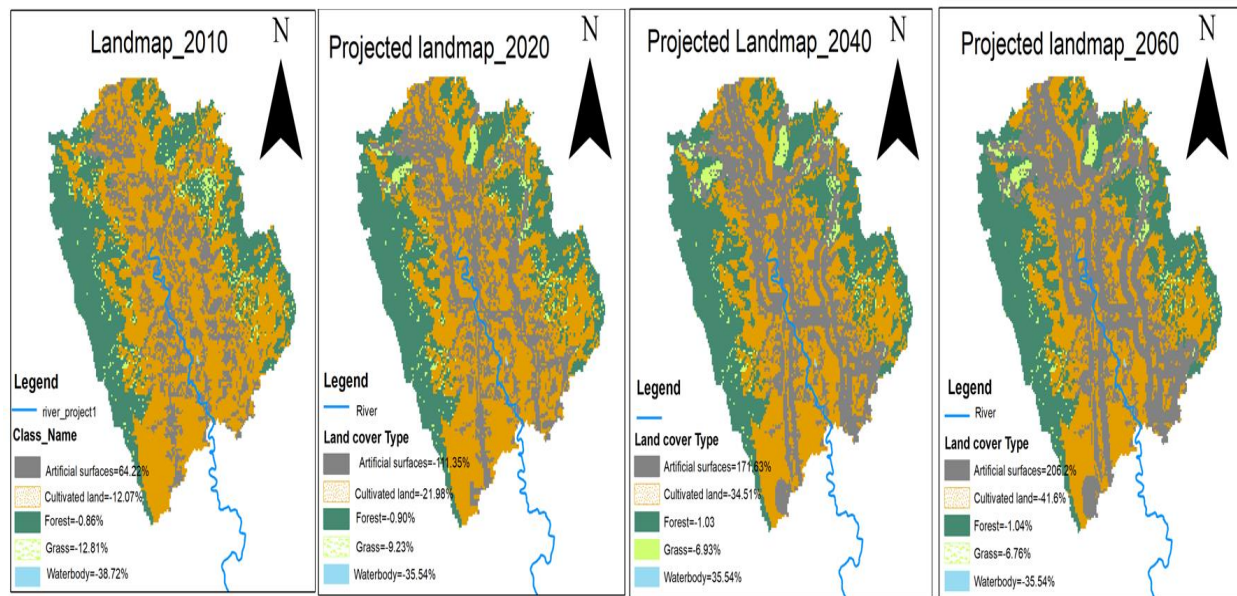

**Figure S2.** Future land use/landcover maps arranged from 2010 to 2060.
